# Supplementary material for: Recent advancements in the electromagnetic interference shielding performance of nanostructured materials and their nanocomposites: a review
Source: Royal Society of Chemistry journal article supplement (doi:10.1039/d1ta09522f), 2022-01-01
Supplement: d1ta09522f1.pdf [file d1ta09522f1.pdf]

## Recent Advancements in Electromagnetic Interference Shielding Performance of Nanostructured Materials and their Nanocomposites: A Review

Suneel Kumar Srivastava\*, and Kunal Manna

Department of Chemistry

Indian Institute of Technology, Khragpur-71302, INDIA

### Supporting Information

| Year | References were found containing "electromagnetic interference" as entered. | % of articles in each years | References were found containing the concept "electromagnetic interference" | % of articles in each years |
|------|-----------------------------------------------------------------------------|-----------------------------|-----------------------------------------------------------------------------|-----------------------------|
| 2020 | 1419                                                                        | 12.1                        | 31607                                                                       | 7.2                         |
| 2019 | 1197                                                                        | 10.2                        | 29706                                                                       | 6.8                         |
| 2018 | 1178                                                                        | 10.1                        | 29459                                                                       | 6.7                         |
| 2017 | 967                                                                         | 8.3                         | 28303                                                                       | 6.5                         |
| 2016 | 849                                                                         | 7.3                         | 27570                                                                       | 6.3                         |
| 2015 | 726                                                                         | 6.2                         | 28575                                                                       | 6.5                         |
| 2014 | 691                                                                         | 5.9                         | 27225                                                                       | 6.2                         |
| 2013 | 631                                                                         | 5.4                         | 26540                                                                       | 6.1                         |
| 2012 | 538                                                                         | 4.6                         | 25721                                                                       | 5.8                         |
| 2011 | 442                                                                         | 3.8                         | 22937                                                                       | 5.3                         |
| 2010 | 482                                                                         | 4.1                         | 22059                                                                       | 5.1                         |
| 2009 | 459                                                                         | 3.9                         | 21272                                                                       | 4.9                         |
| 2008 | 400                                                                         | 3.4                         | 20087                                                                       | 4.6                         |
| 2007 | 365                                                                         | 3.2                         | 19076                                                                       | 4.4                         |
| 2006 | 363                                                                         | 3.1                         | 17490                                                                       | 4                           |
| 2005 | 260                                                                         | 2.3                         | 15223                                                                       | 3.5                         |
| 2004 | 199                                                                         | 1.7                         | 13078                                                                       | 3                           |
| 2003 | 135                                                                         | 1.2                         | 10570                                                                       | 2.4                         |
| 2002 | 170                                                                         | 1.5                         | 8972                                                                        | 2.1                         |
| 2001 | 192                                                                         | 1.7                         | 8228                                                                        | 1.9                         |
| 2000 | 107                                                                         | 1                           | 7546                                                                        | 1.8                         |
